# Supplementary material for: Pharmacokinetics and Metabolism Study of Deep-Sea-Derived Butyrolactone I in Rats by UHPLC–MS/MS and UHPLC–Q-TOF-MS
Source: MDPI journal article supplement (doi:10.3390/md20010011), 2021-12-22
Supplement: s1 [file s1]

# Supplementary Materials

## Pharmacokinetics and Metabolism Study of Deep-Sea-Derived Butyrolactone I in Rats by UHPLC-MS/MS and UHPLC-Q-TOF-MS

Liang Wu <sup>1</sup>, Chun-Lan Xie <sup>2</sup>, Xian-Wen Yang <sup>2,\*</sup> and Gang Chen <sup>1,\*</sup>

<sup>1</sup> School of Pharmacy, Fudan University, Shanghai, China; yhdhospital@163.com

<sup>2</sup> Key Laboratory of Marine Biogenetic Resources, Third Institute of Oceanography, Ministry of Natural Resources, 184 Daxue Road, Xiamen, 361005 Fujian, China; xiechunlanxx@163.com

\* Correspondence: yangxianwen@tio.org.cn (X.-W.Y.); hhcy\_educy@163.com (G.C.); Tel.: +86-592-219-5319 (X.-W.Y.); +86-21-51980168 (G.C.).

## Content

Figure S1. <sup>1</sup>H NMR spectrum of **1** in MeOD.

Figure S2. <sup>13</sup>C NMR spectrum of **1** in MeOD.

Figure S3. HSQC NMR spectrum of **1** in MeOD.

Figure S4. HMBC NMR spectrum of **1** in MeOD.

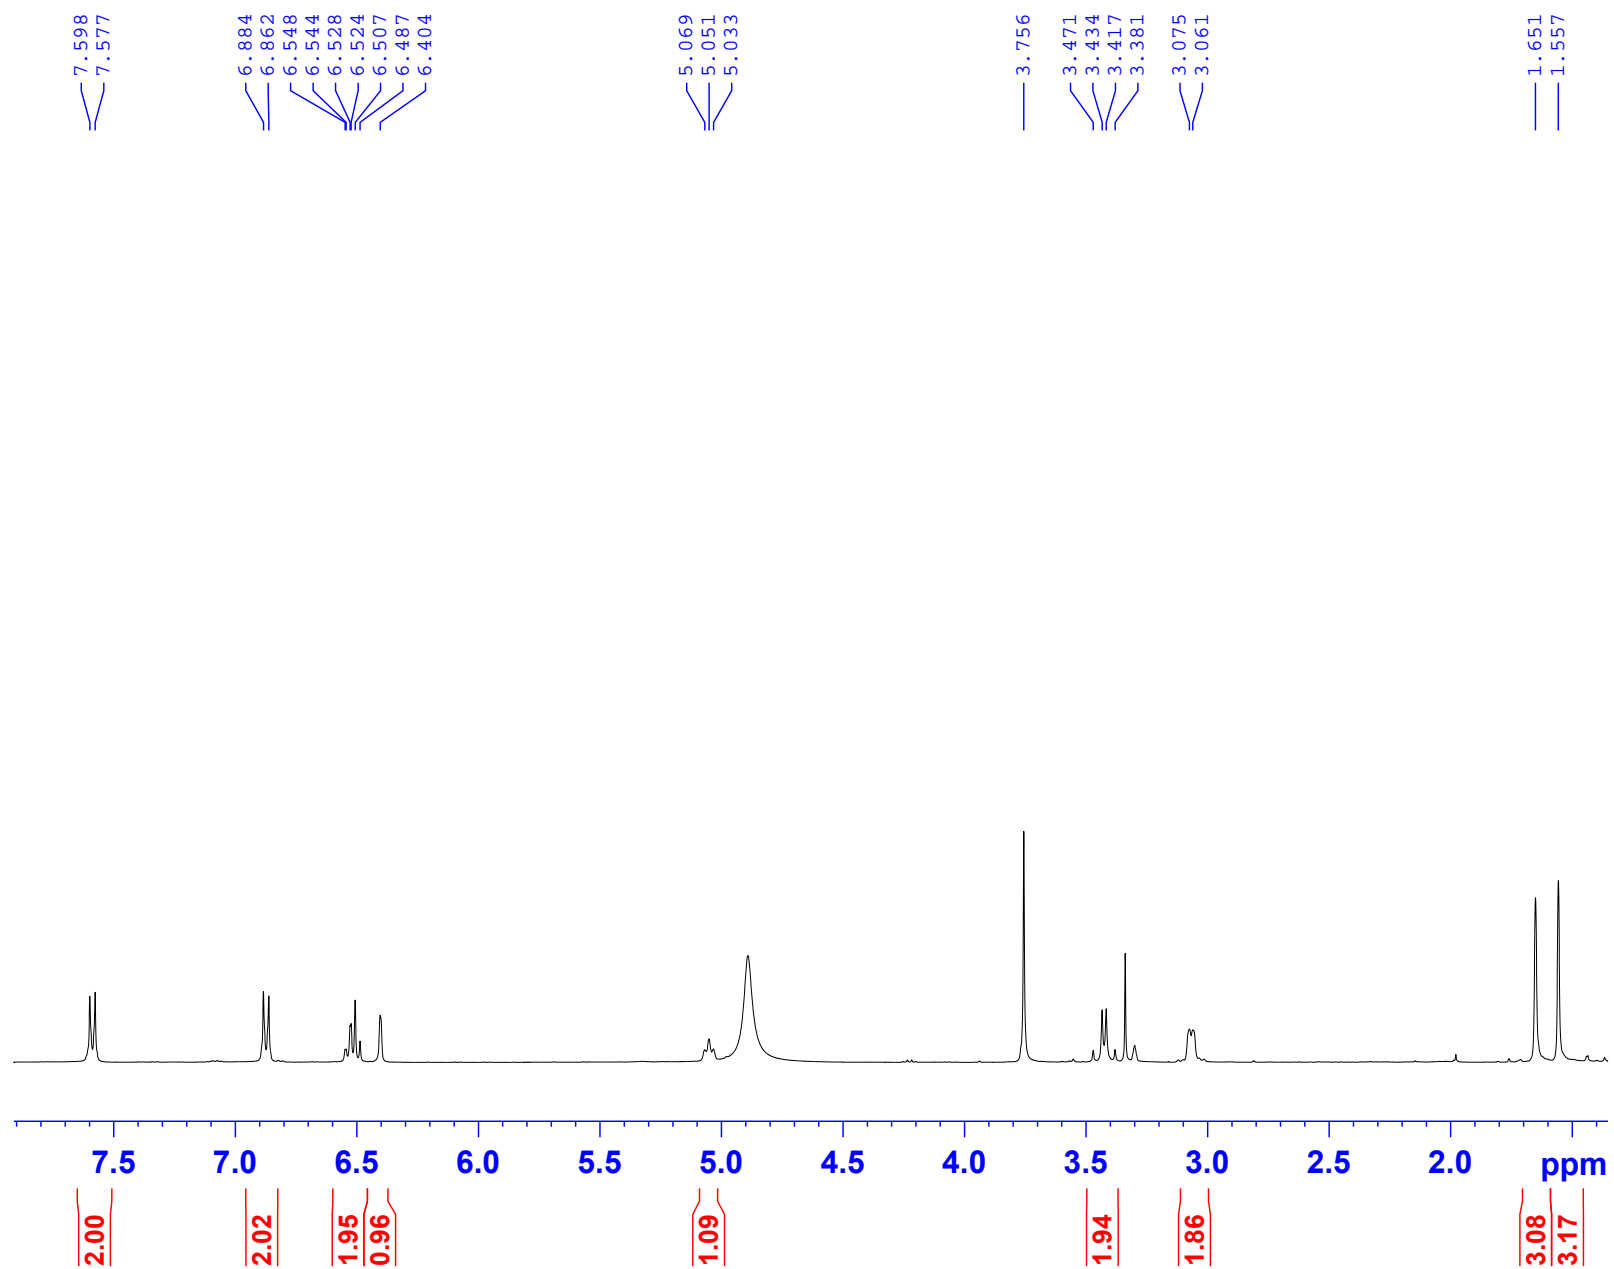

Figure S1. <sup>1</sup>H NMR spectrum of **1** in MeOD.

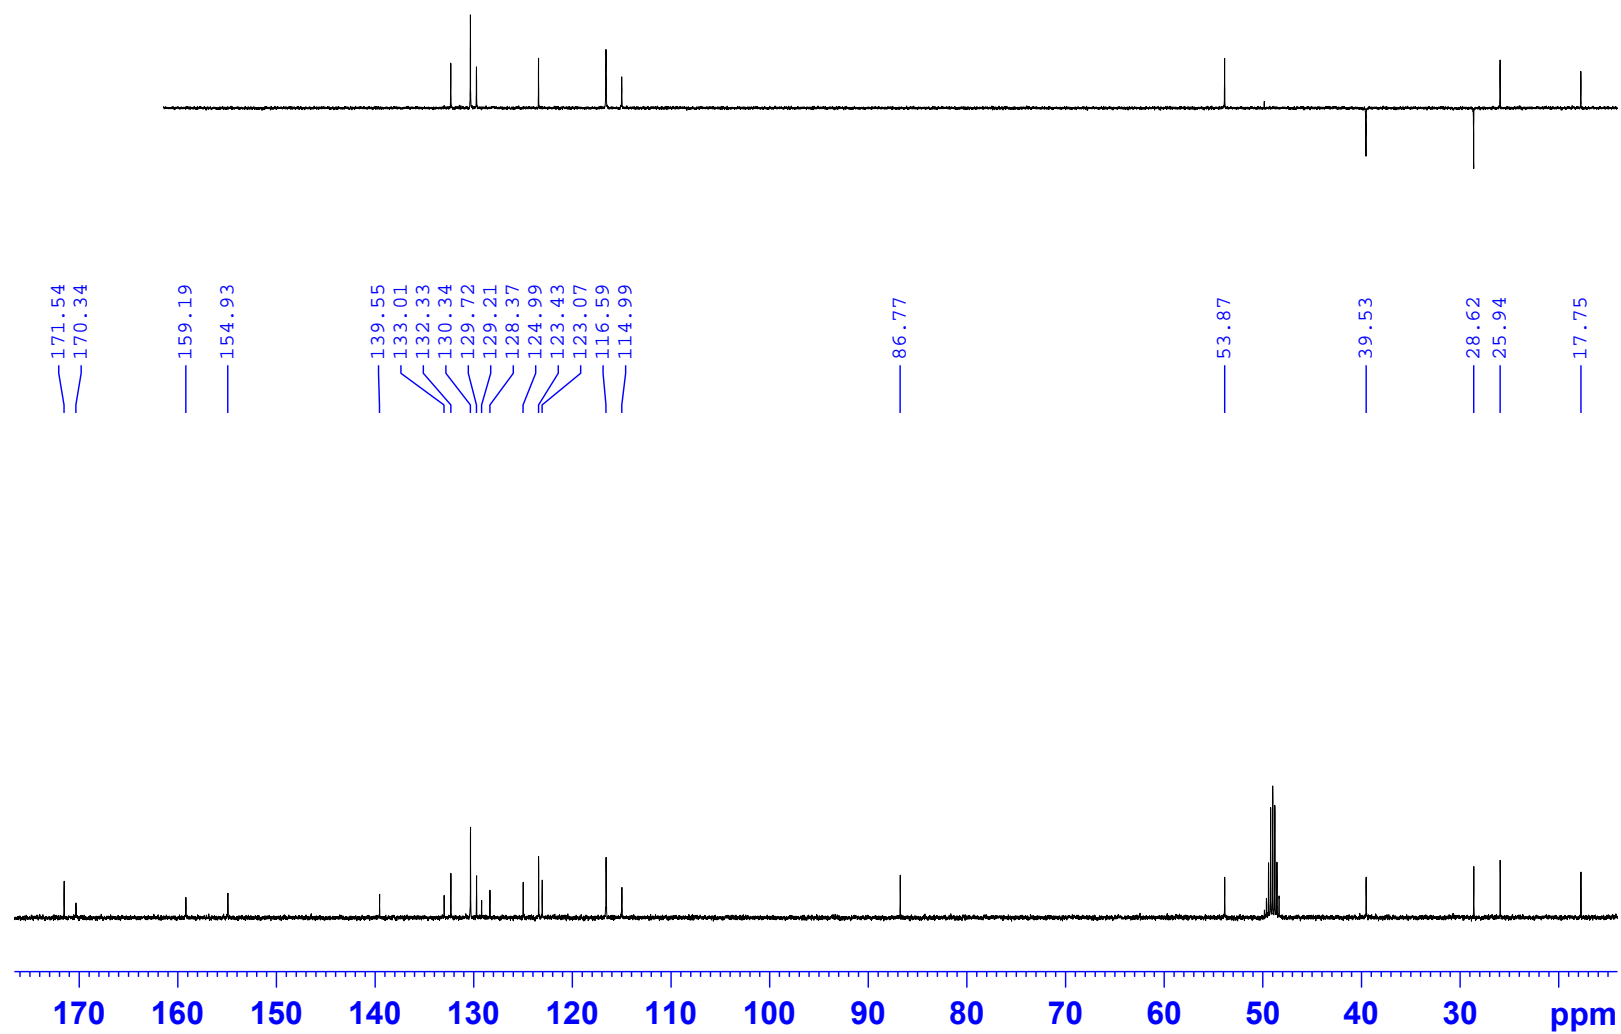

Figure S2.  $^{13}\text{C}$  NMR spectrum of **1** in MeOD.

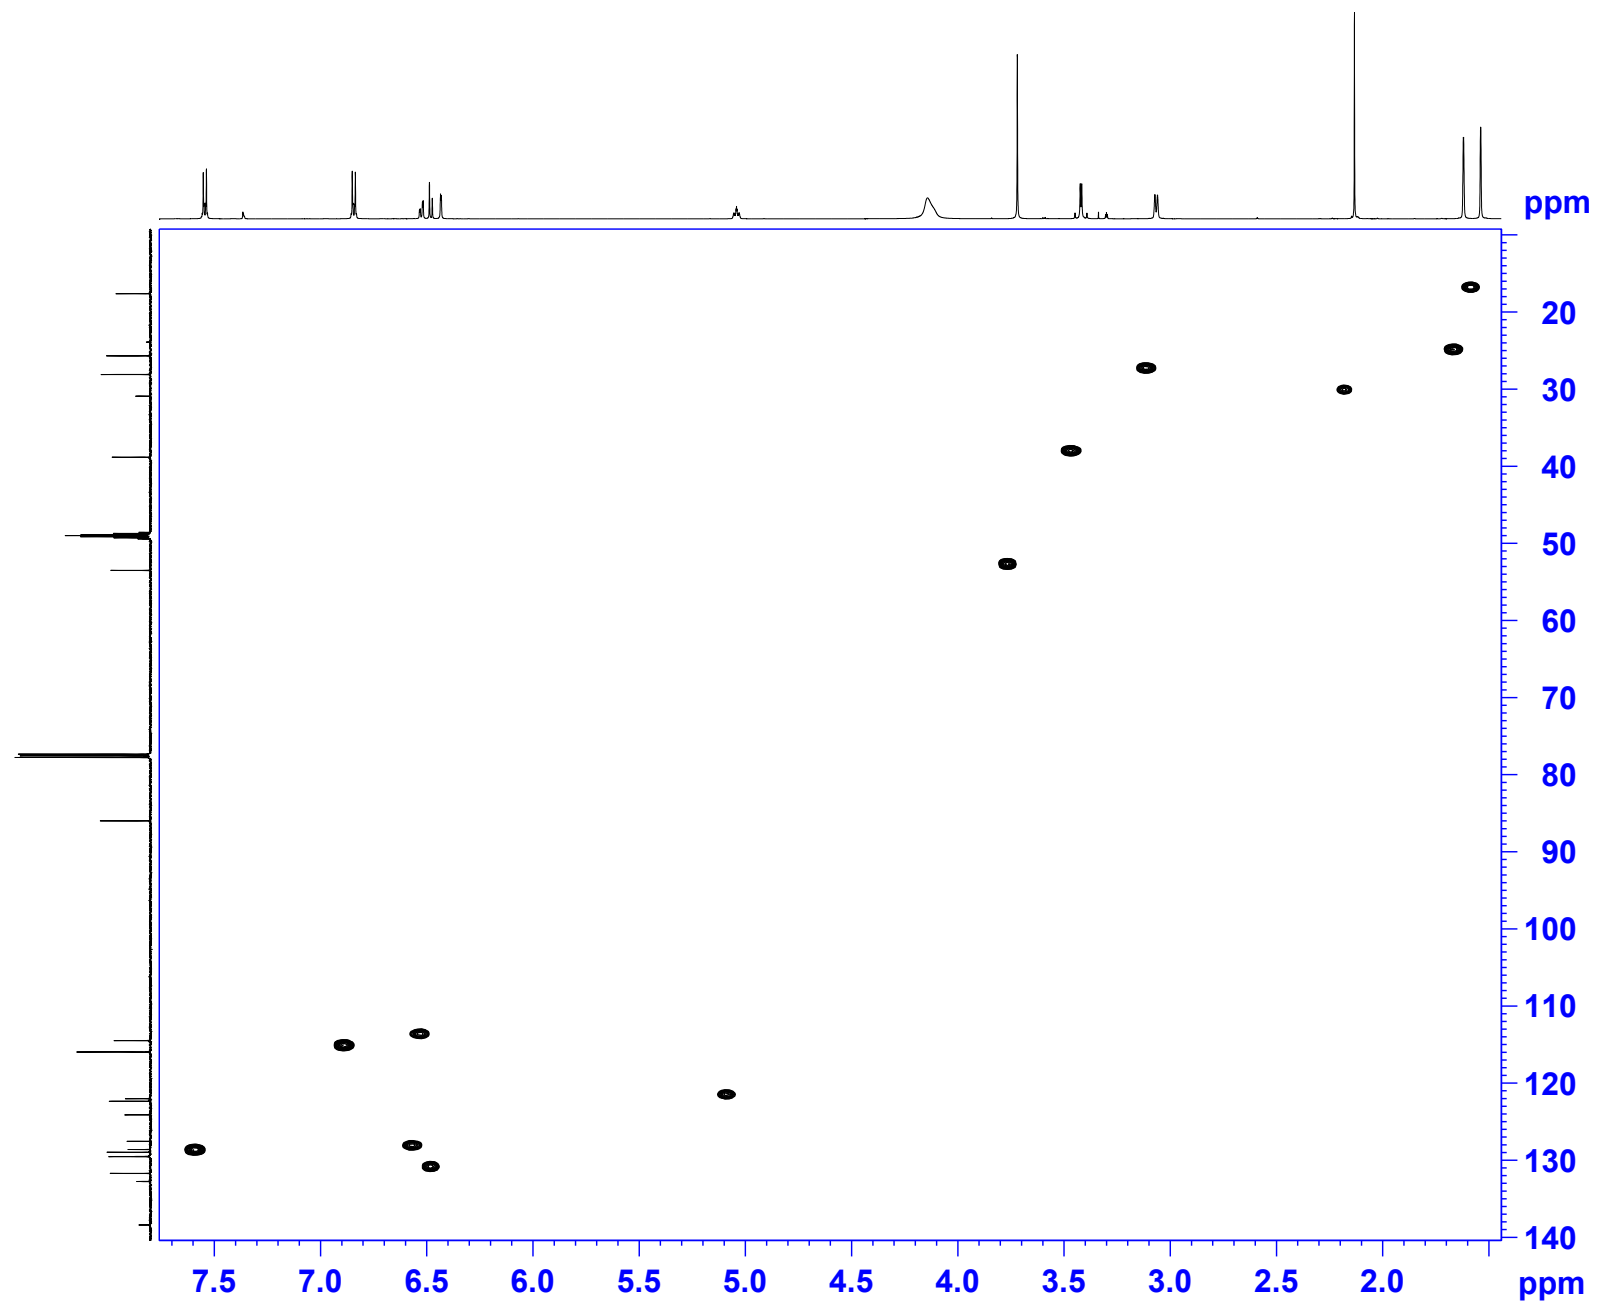

Figure S3. HSQC NMR spectrum of **1** in MeOD.

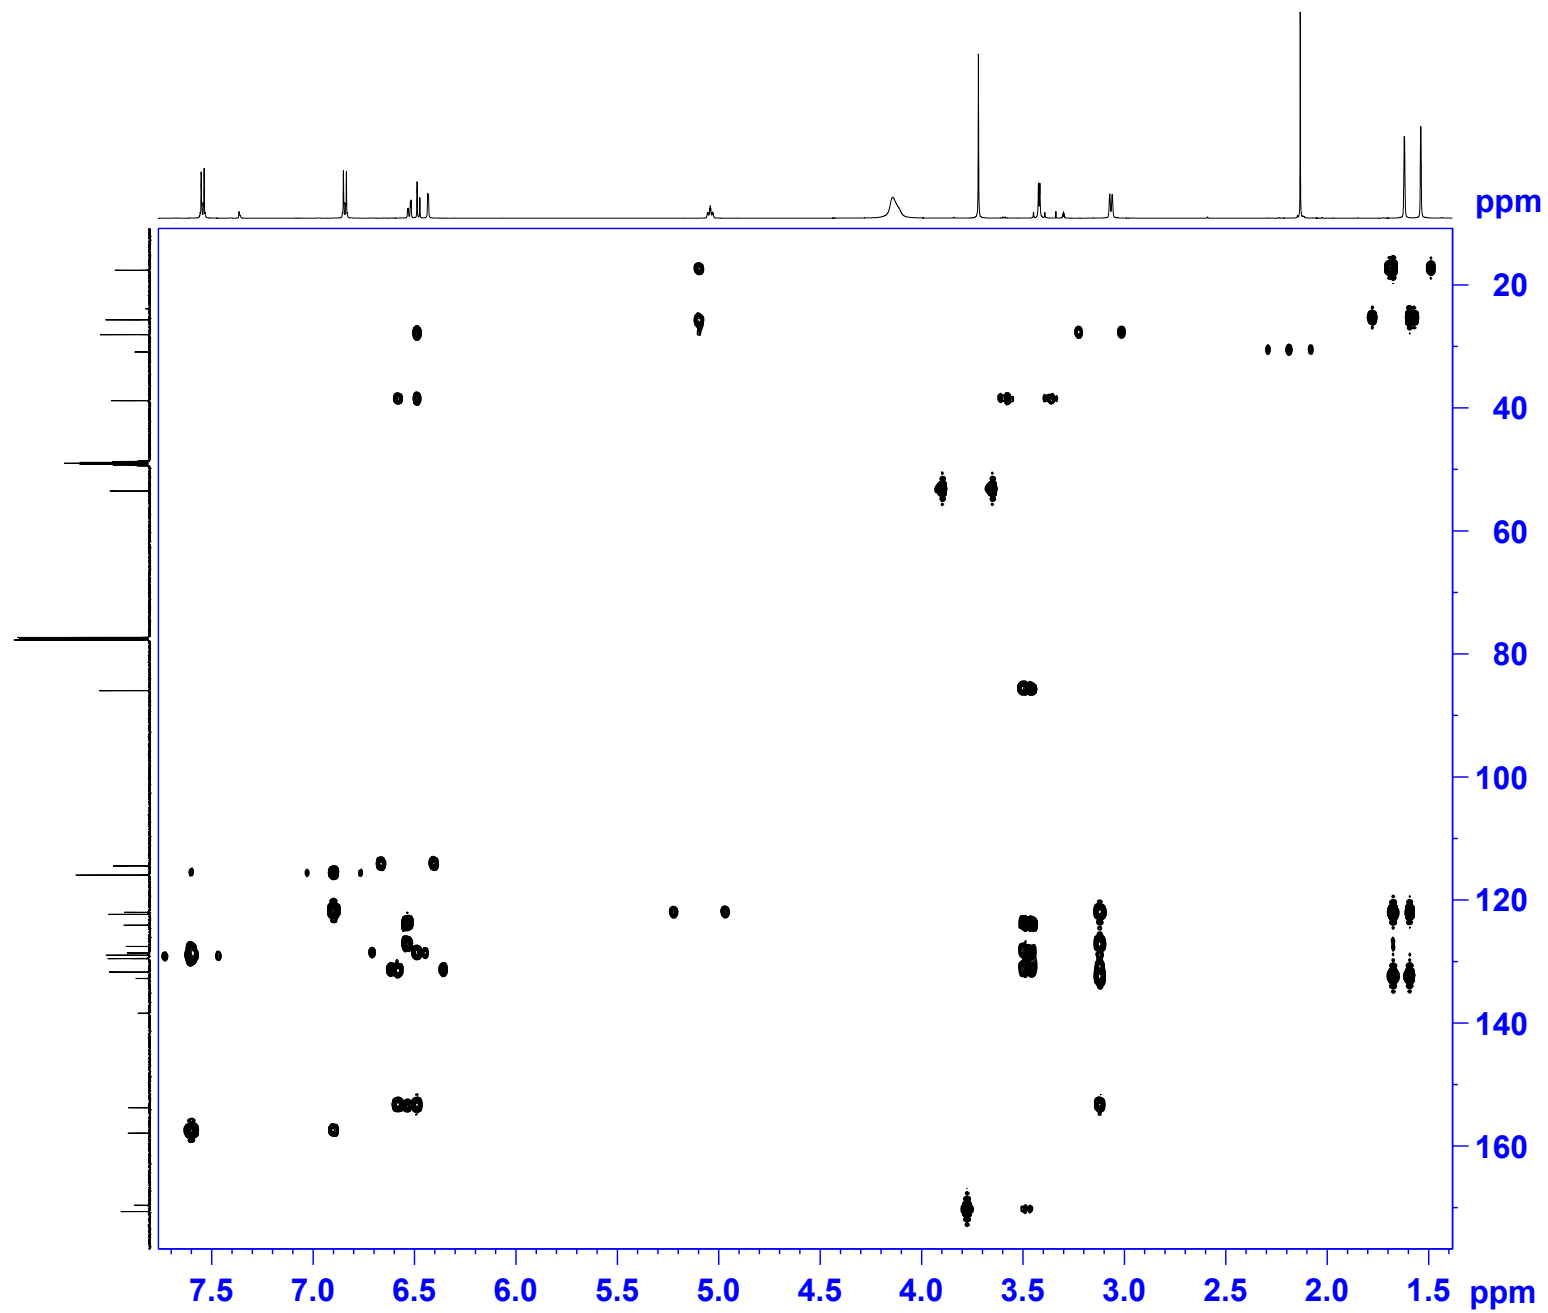

Figure S4. HMBC NMR spectrum of **1** in MeOD.
